# Supplementary material for: Fully biobased, catalyst-free vitrimers from tannic acid: a facile combination of mechanical robustness, recyclability and sustainability
Source: Royal Society of Chemistry journal article supplement (doi:10.1039/d4gc00259h), 2024-01-01
Supplement: d4gc00259h2.pdf [file d4gc00259h2.pdf]

## Supporting information

# Fully biobased, catalyst-free vitrimers from tannic acid: facile combination of mechanical robustness, recyclability and sustainability

Jie Li<sup>a</sup>, Benzhi Ju<sup>a, \*</sup> and Shufen Zhang<sup>a</sup>

\*Corresponding author: Jubenzhi@dlut.edu.cn

<sup>1</sup> State Key Laboratory of Fine Chemicals, Dalian University of Technology, Dalian 116024, PR China

**Table S1** Formulations

|    | EVO ([epoxy]=0.075 mol | tannic acid | Maleic anhydride  |
|----|------------------------|-------------|-------------------|
| S3 | ESO=20.00 g            | 8.51 g      | 7.36 g, 0.075 mol |
| S4 | ESO=20.00 g            | 6.38 g      | 7.36 g, 0.075 mol |
| S5 | ESO=20.00 g            | 5.06 g      | 7.36 g, 0.075 mol |
| L3 | ELO=12.68 g            | 8.51 g      | 7.36 g, 0.075 mol |
| L4 | ELO=12.68 g            | 6.38 g      | 7.36 g, 0.075 mol |
| L5 | ELO=12.68 g            | 5.06 g      | 7.36 g, 0.075 mol |

**Table S2** Summary of thermomechanical properties of pristine vitrimers

|    | Tensile strength/MPa | Elongation at break/% | Young's Modulus/MPa* | Rubbery Platform at T <sub>g</sub> +80°C/MPa | Crosslink density /mol·cm <sup>-3</sup> | T <sub>g</sub> /°C | T <sub>d5</sub> /°C |
|----|----------------------|-----------------------|----------------------|----------------------------------------------|-----------------------------------------|--------------------|---------------------|
| S3 | 35.2±3.0             | 18.1±0.4              | 365.8                | 4.49                                         | 436.6                                   | 76.2               | 292                 |
| S4 | 27.7±0.9             | 15.6±0.6              | 325.7                | 4.54                                         | 432.1                                   | 68.5               | 307                 |
| S5 | 21.9±1.1             | 26.6±6.7              | 224.7                | 5.41                                         | 505.3                                   | 59.5               | 322                 |
| L3 | 52.4±4.1             | 8.0±1.4               | 520.3                | 6.68                                         | 578.3                                   | 109.7              | 282                 |
| L4 | 47.2±1.3             | 7.8±0.6               | 737.9                | 14.80                                        | 1259.7                                  | 117.9              | 256                 |
| L5 | 51.6±2.4             | 11.0±1.1              | 519.9                | 15.85                                        | 1296.7                                  | 136.9              | 291                 |

\*calculated using 2% stress on the representative tensile curves

**Table S3** Summary of thermomechanical properties of 3<sup>rd</sup> recycled vitrimers

|       | Tensile strength/MPa | Elongation at break/% | Young's Modulus/MPa* | Storage modulus at T <sub>g</sub> +80°C/MPa | Crosslink density /mol·cm <sup>-3</sup> ** | T <sub>g</sub> /°C | T <sub>d5</sub> /°C |
|-------|----------------------|-----------------------|----------------------|---------------------------------------------|--------------------------------------------|--------------------|---------------------|
| S3-r3 | 19.0±0.7             | 17.2±2.4              | 375.8                | 0.147                                       | 14.41                                      | 56.1               | 261                 |
| S4-r3 | 18.0±1.8             | 30.9±13.4             | 328.0                | 0.374                                       | 37.59                                      | 45.5               | 265                 |
| S5-r3 | 14.6±0.3             | 59.7±5.1              | 206.0                | 2.005                                       | 200.79                                     | 47.2               | 296                 |
| L3-r3 | 17.0±0.2             | 4.0±0.1               | 401.0                | 1.972                                       | 175.83                                     | 96.5               | 266                 |
| L4-r3 | 13.9±1.0             | 4.4±0.1               | 323.7                | 1.734                                       | 156.10                                     | 92.2               | 271                 |
| L5-r3 | 25.8±2.6             | 7.7±0.1               | 314.7                | 1.583                                       | 146.42                                     | 80.3               | 274                 |

\*calculated using 2% stress on the representative tensile curves

## Calculation of activation energies for viscous flow of S3 and L3 vitrimers

Characteristic relaxation time ( $\tau^*$ , s) indicating the time it takes for  $G$  to reduce to 1/e of the initial modulus at different temperatures were obtained from the stress relaxation experiments :

**Table S4** Characteristic relaxation times (s) of S3 and L3 vitrimers

|    | 160°C | 170°C | 180°C | 190°C | 200°C |
|----|-------|-------|-------|-------|-------|
| S3 | 5870  | 3590  | 2399  | 1520  | --    |
| L3 | --    | 5570  | 1963  | 1216  | 524   |

The natural logarithm of  $\tau^*$  was plotted versus 1000/T, where T indicates the absolute temperature (K). Linear fittings  $y = ax + b$  were obtained:

**Table S5** Arrhenius fitting parameters for viscous flow of S3 and L3 vitrimers

| sample | a                | b                 |
|--------|------------------|-------------------|
| S3     | 8.94098±0.1998   | -11.9701±0.44624  |
| L3     | 15.88668±1.44212 | -27.30334±3.15052 |

Because the viscous flow of vitrimers can be described using Arrhenius Equation:

$$\ln(\tau^*) = \frac{E_a}{RT} + \ln(\tau_0)$$

where  $E_a$  (kJ/mol) represents the activation energy for vitirmer viscous flow,  $R=8.314$  J/mol·K<sup>-1</sup> is the universal gas constant,  $T$  is the absolute temperature (K).  $E_a$  is then given by:

$$E_a = a \times R$$

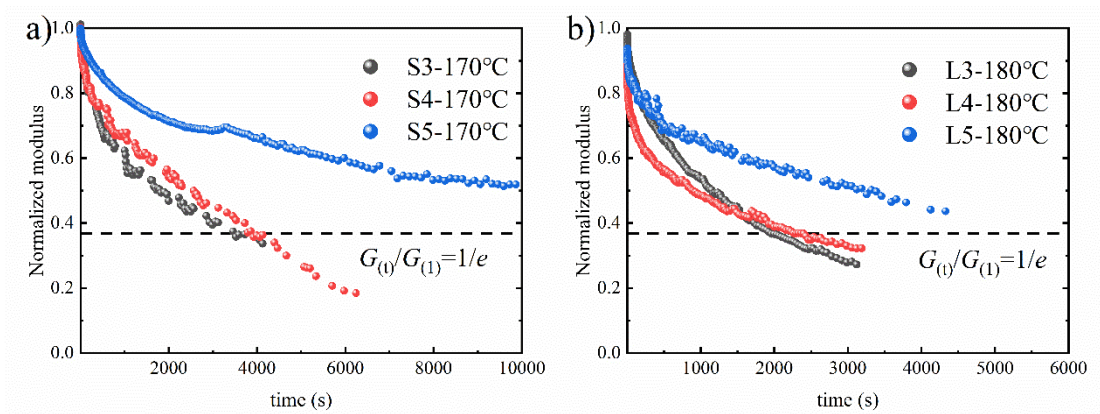

**Figure S1** Stress relaxation curves of a) ESO-based vitrimers at 170°C and b) ELO-based vitrimers at 180°C

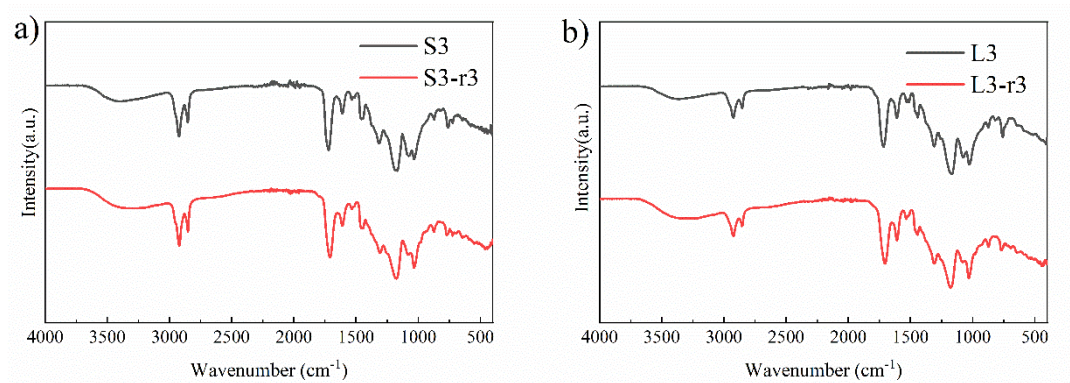

**Figure S2** FT-IR spectra of pristine and 3<sup>rd</sup> recycled a) S3 and b) L3 vitrimers

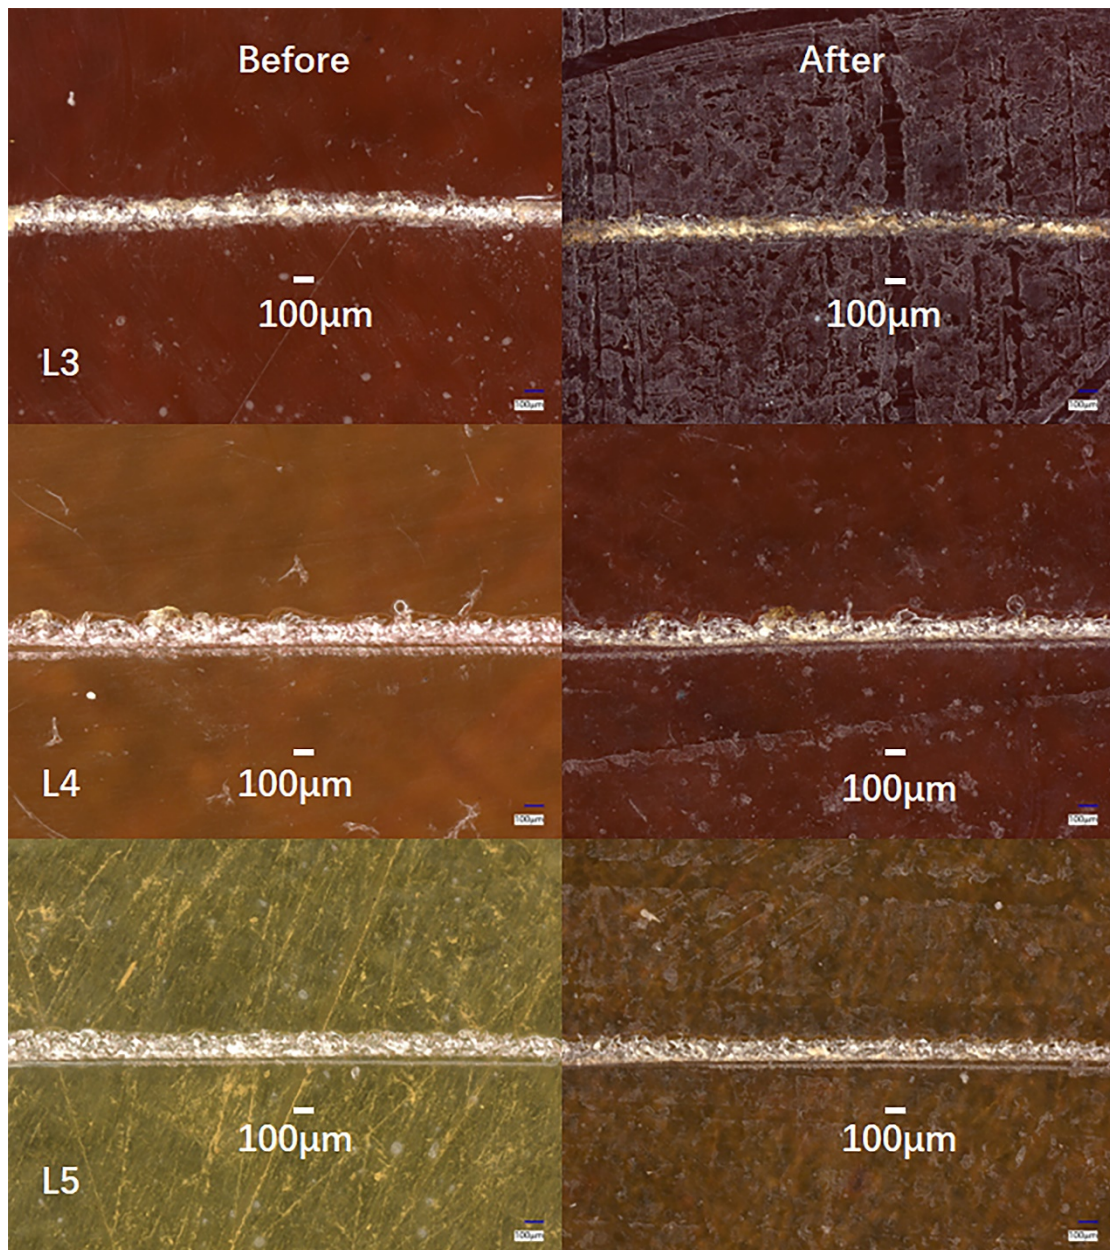

**Figure S3** Microscopic photos of cracks on ELO-based vitrimers before and after undergoing a scratch-healing procedure

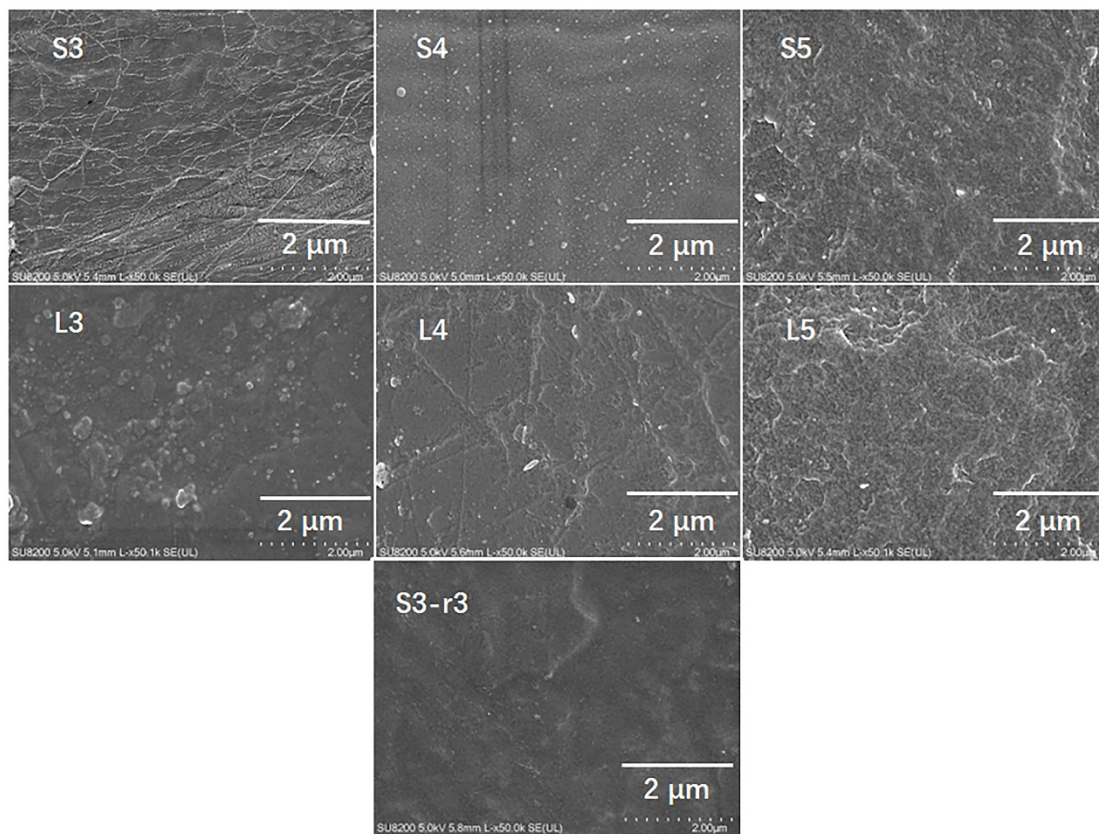

**Figure S4** SEM images of vitrimer samples. Obtained on a scanning electron microscope (SU8220, Hitachi, Japan)

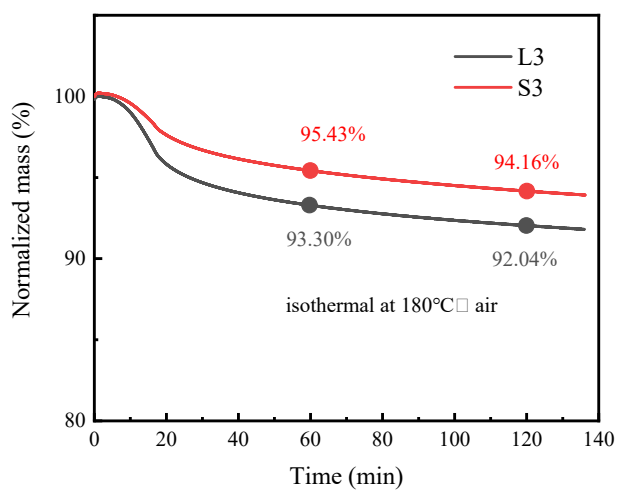

**Figure S5** Isothermal TGA results for S3 and L3 vitrimers in air, with residual mass fractions at 1 h and 2 h marked.

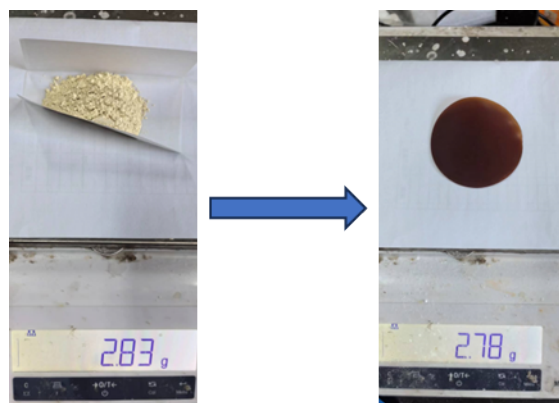

**Figure S6** Photos of the L4-r2 vitrimer powder and the recycled L4-r3 sample. The loss ratio of recycling was 1.77%.

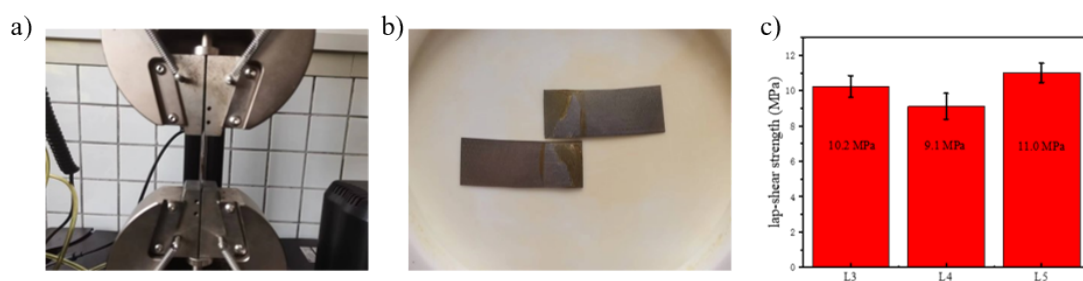

**Figure S7** Adhesive test results. a) equipment for lap-shear test; b) a photo of failed Q235 steel plates bonded using L5 glue. Clear adhesive failure can be observed; c) lap-shear strength of ELO-based vitrimers.

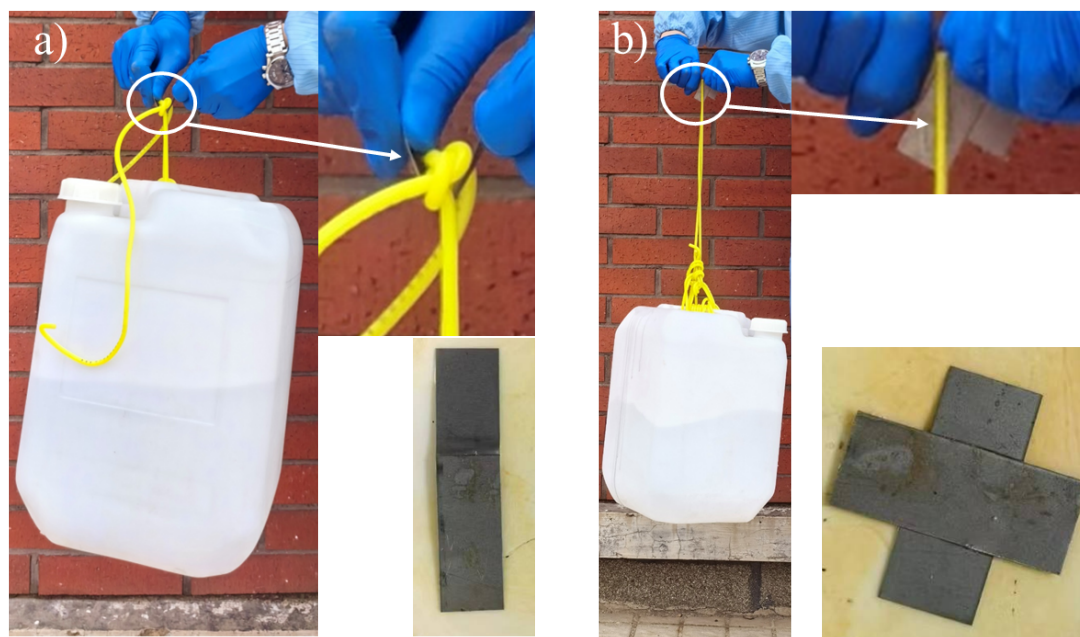

**Figure S8** Bonded Q235 steel plates using 2~3 drops of L5 glue can afford a bucket weighing 11.2 kg. The size of steel plates was 2 cm × 5 cm.

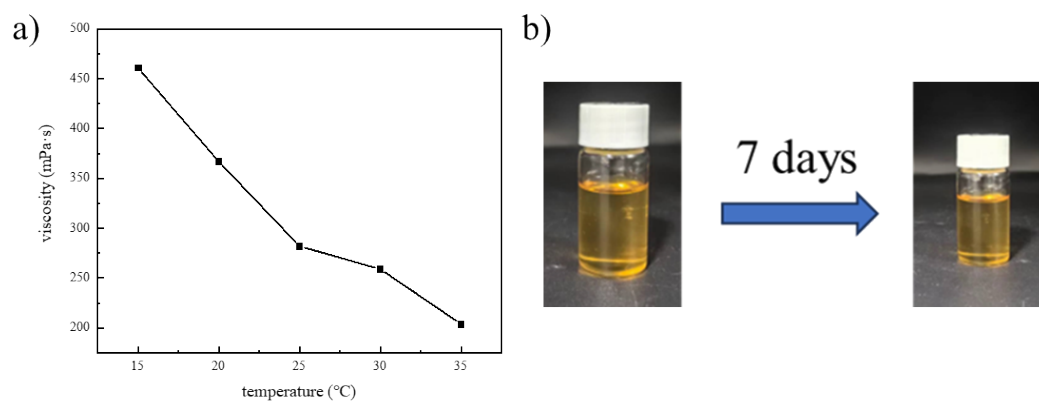

**Figure S9** a) viscosity of L5 vitrimer glue. Obtained on a Ubbelohde Viscometer equipped with a 2# rotor, 6 rpm; b) photos of L5 vitrimer glue. It kept stable at 10°C for at least 7 days.

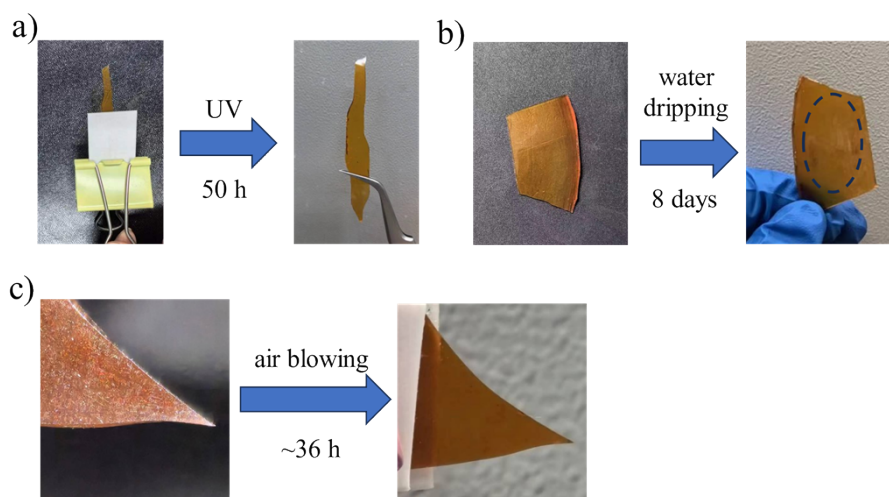

**Figure S10** Weather resistance tests using an L3 vitrimer piece. a) UV exposure (365 nm, 24 W) for 50 h; b) water dripping for 8 days (1 drop per second); c) hot air blowing for 36 hours.

**Table S6** Comprehensive comparison of reported EVO vitrimers (ref.1~8 and this work), other vitrimers (ref.9~13) and regular EVO thermosets (ref.13~17)

| Ref. NO. | Tensile strength (virgin)/MPa | Reprocessing condition | Tensile strength (1 <sup>st</sup> recycled)/MPa | Epoxy resin              | Dynamic covalent bond | Catalyst              |
|----------|-------------------------------|------------------------|-------------------------------------------------|--------------------------|-----------------------|-----------------------|
| 1        | 37.4                          | 190°C/20 MPa/5 min     | ~33                                             | ESO                      | Schiff base           | none                  |
| 2        | 3.49                          | 180°C/20 MPa/10 min    | ~2.5                                            | ESO                      | disulfide             | none                  |
| 3        | 16.62                         | 160°C/10 MPa/1 h       | ~14                                             | ESO                      | DTE                   | Zn(acac) <sub>2</sub> |
| 4        | 3.1                           | 200°C/20 MPa/135 min   | 1.4                                             | ESO                      | DTE                   | TBD                   |
| 5        | 0.6                           | Not reported           | --                                              | ESO                      | DTE                   | none                  |
| 6        | 23                            | 160°C/3 ton/10 min     | 19                                              | ELO                      | boronic ester         | none                  |
| 7        | 1.8                           | 130°C/10 MPa/15 min    | ~1.5                                            | ESO                      | DTE                   | none                  |
| 8        | 7.4                           | 160°C/10 MPa/3 h       | 8.9                                             | ESO                      | DTE                   | none                  |
| L5       | 52.4                          |                        | 28.9                                            |                          |                       |                       |
| L4       | 47.2                          | 170°C/20 MPa/2 h       | 35.6                                            | ELO                      |                       |                       |
| L3       | 51.6                          |                        | 36.9                                            |                          | DTE                   | none                  |
| S5       | 21.9                          |                        | 20.5                                            |                          |                       |                       |
| S4       | 27.7                          | 160°C/15 MPa/2 h       | 24.9                                            | ESO                      |                       |                       |
| S3       | 35.2                          |                        | 31.3                                            |                          |                       |                       |
| 9        | ~70                           | 200°C/10 MPa/2 h       | ~70                                             | bisphenol A epoxy        | DTE                   | none                  |
| 10       | ~55                           | 240°C/3 min            | ~50                                             | bisphenol A epoxy        | DTE                   | Zn(acac) <sub>2</sub> |
| 11       | 10.98                         | 100°C/60 min           | 9.07                                            | isosorbide-derived epoxy | disulfide             | none                  |
| 12       | 0.18                          | 100°C                  | ~0.18                                           | catechol-derived epoxies | DTE                   | Zn(acac) <sub>2</sub> |
| 13       | 94.1                          | Not reported           | --                                              | bisphenol A epoxy        | DTE                   | none                  |
| 14       | 28.7                          |                        |                                                 | ESO                      |                       |                       |
| 15       | 23                            |                        |                                                 | ESO                      |                       |                       |
|          | 40                            |                        |                                                 | ELO                      |                       |                       |
| 16       | 0.68                          |                        |                                                 | ESO                      |                       |                       |
| 17       | 7.85                          |                        |                                                 | ESO                      |                       |                       |

(1) Zhao, X.-L.; Liu, Y.-Y.; Weng, Y.; Li, Y.-D.; Zeng, J.-B. Sustainable Epoxy Vitrimers from Epoxidized Soybean Oil and Vanillin. *ACS Sustain Chem Eng* 2020, 8 (39), 15020-15029. DOI: 10.1021/acssuschemeng.0c05727.



- (2) Liu, Y.-Y.; He, J.; Li, Y.-D.; Zhao, X.-L.; Zeng, J.-B. Biobased, reprocessable and weldable epoxy vitrimers from epoxidized soybean oil. *Industrial Crops and Products* 2020, 153. DOI: 10.1016/j.indcrop.2020.112576.
- (3) Yang, X.; Guo, L.; Xu, X.; Shang, S.; Liu, H. A fully bio-based epoxy vitrimer: Self-healing, triple-shape memory and reprocessing triggered by dynamic covalent bond exchange. *Materials & Design* 2020, 186. DOI: 10.1016/j.matdes.2019.108248.
- (4) Wu, J.; Yu, X.; Zhang, H.; Guo, J.; Hu, J.; Li, M.-H. Fully Biobased Vitrimers from Glycyrrhizic Acid and Soybean Oil for Self-Healing, Shape Memory, Weldable, and Recyclable Materials. *ACS Sustain Chem Eng* 2020. DOI: 10.1021/acssuschemeng.0c01047.
- (5) Altuna, F. I.; Pettarin, V.; Williams, R. J. J. Self-healable polymer networks based on the cross-linking of epoxidised soybean oil by an aqueous citric acid solution. *Green Chem* 2013, 15 (12). DOI: 10.1039/c3gc41384e.
- (6) Sangaletti, D.; Ceseracciu, L.; Marini, L.; Athanassiou, A.; Zych, A. Biobased boronic ester vitrimer resin from epoxidized linseed oil for recyclable carbon fiber composites. *Resources, Conservation and Recycling* 2023, 198. DOI: 10.1016/j.resconrec.2023.107205.
- (7) Li, C.; Ju, B.; Zhang, S. Fully bio-based hydroxy ester vitrimer synthesized by crosslinking epoxidized soybean oil with doubly esterified starch. *Carbohydr Polym* 2023, 302, 120442. DOI: 10.1016/j.carbpol.2022.120442.
- (8) Li, J.; Ju, B.; Zhang, S. Catalyst-free, sustainable epoxy vitrimers from epoxidized soybean oil and natural sugar alcohols. *Industrial Crops and Products* 2023, 205. DOI: 10.1016/j.indcrop.2023.117466.
- (9) Liu, Y.; Ma, S.; Li, Q.; Wang, S.; Huang, K.; Xu, X.; Wang, B.; Zhu, J. Dynamic transfer auto-catalysis of epoxy vitrimers enabled by the carboxylic acid/epoxy ratio based on facilely synthesized trifunctional monoesterified cyclic anhydrides. *Eur Polym J* 2020, 135. DOI: 10.1016/j.eurpolymj.2020.109881.
- (10) Montarnal, D.; Capelot, M.; Tournilhac, F.; Leibler, L. Silica-Like Malleable Materials from Permanent Organic Networks. 2011, 334 (6058), 965-968. DOI: doi:10.1126/science.1212648.
- (11) Ma, Z. Y.; Wang, Y.; Zhu, J.; Yu, J. R.; Hu, Z. M. Bio-Based Epoxy Vitrimers: Reprocessability, Controllable Shape Memory, and Degradability. *J Polym Sci Pol Chem* 2017, 55 (10), 1790-1799. DOI: 10.1002/pola.28544.
- (12) Zhao, S.; Abu-Omar, M. M. Catechol-Mediated Glycidylation toward Epoxy Vitrimers/Polymers with Tunable Properties. *Macromolecules* 2019, 52 (10), 3646-3654. DOI: 10.1021/acs.macromol.9b00334.
- (13) Hao, C.; Liu, T.; Zhang, S.; Liu, W.; Shan, Y.; Zhang, J. Triethanolamine-Mediated Covalent Adaptable Epoxy Network: Excellent Mechanical Properties, Fast Repairing, and Easy Recycling. *Macromolecules* 2020, 53 (8), 3110-3118. DOI: 10.1021/acs.macromol.9b02243.
- (14) Li, Y.-D.; Jian, X.-Y.; Zhu, J.; Du, A.-K.; Zeng, J.-B. Fully biobased and high performance epoxy thermosets from epoxidized soybean oil and diamino terminated polyamide 1010 oligomers. *Polymer Testing* 2018, 72, 140-146. DOI: 10.1016/j.polymertesting.2018.10.010.
- (15) Tsujimoto, T.; Takeshita, K.; Uyama, H. Bio-based Epoxy Resins from Epoxidized Plant Oils and Their Shape Memory Behaviors. *Journal of the American Oil Chemists' Society* 2016, 93 (12), 1663-1669. DOI: 10.1007/s11746-016-2907-5.
- (16) Pansumdaeng, J.; Kuntharin, S.; Harnchana, V.; Supanchaiyamat, N. Fully bio-based epoxidized soybean oil thermosets for high performance triboelectric nanogenerators. *Green Chem* 2020, 22 (20), 6912-6921. DOI: 10.1039/d0gc01738h.
- (17) Jian, X.-Y.; He, Y.; Li, Y.-D.; Wang, M.; Zeng, J.-B. Curing of epoxidized soybean oil with crystalline oligomeric poly(butylene succinate) towards high performance and sustainable epoxy resins. *Chem Eng J* 2017, 326, 875-885. DOI: 10.1016/j.cej.2017.06.039.
